# Supplementary material for: Use of optical absorption indices to assess seasonal variability of dissolved organic matter in Amazon floodplain lakes
Source: Copernicus journal article supplement (doi:10.5194/bg-17-5355-2020), 2020-11-09
Supplement: Supplementary file 1 [file bg-17-5355-2020-supplement.pdf]

Supplement of Biogeosciences, 17, 5355–5364, 2020  
<https://doi.org/10.5194/bg-17-5355-2020-supplement>  
© Author(s) 2020. This work is distributed under  
the Creative Commons Attribution 4.0 License.

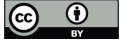

*Supplement of*

## **Use of optical absorption indices to assess seasonal variability of dissolved organic matter in Amazon floodplain lakes**

**Maria Paula da Silva et al.**

*Correspondence to:* Maria Paula da Silva ([maria-paula.da-silva@ufz.de](mailto:maria-paula.da-silva@ufz.de))

The copyright of individual parts of the supplement might differ from the CC BY 4.0 License.

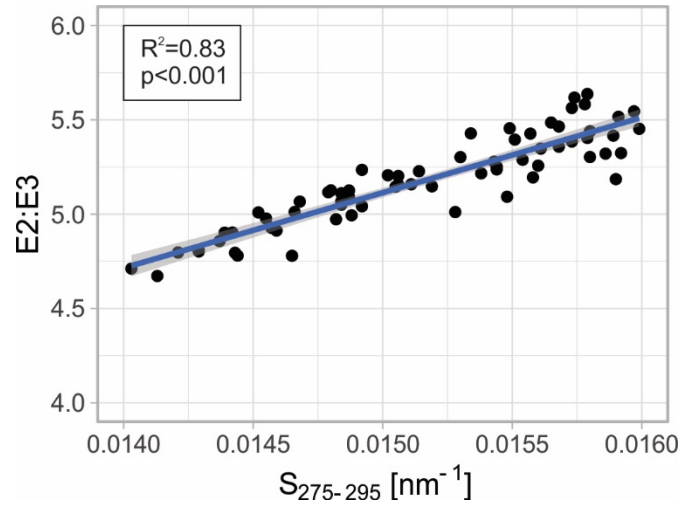

Figure S1 – Relationship between  $S_{275-295}$  and  $E2/E3$  for all lakes and phases. The blue line represents the linear model with fitted parameters described in the box on the top left side.

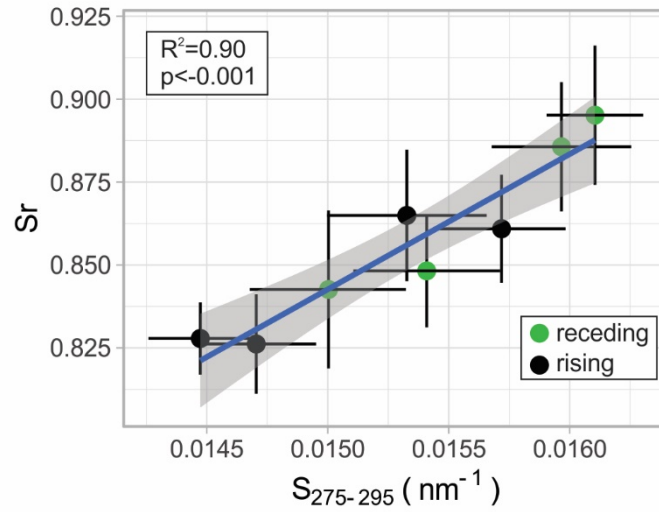

Figure S2 – Relationship between average  $S_{275-295}$  and  $S_R$  calculated for the rising and receding limb in all lakes. The blue line represents the linear model with fitted parameters described in the box on the top left side.

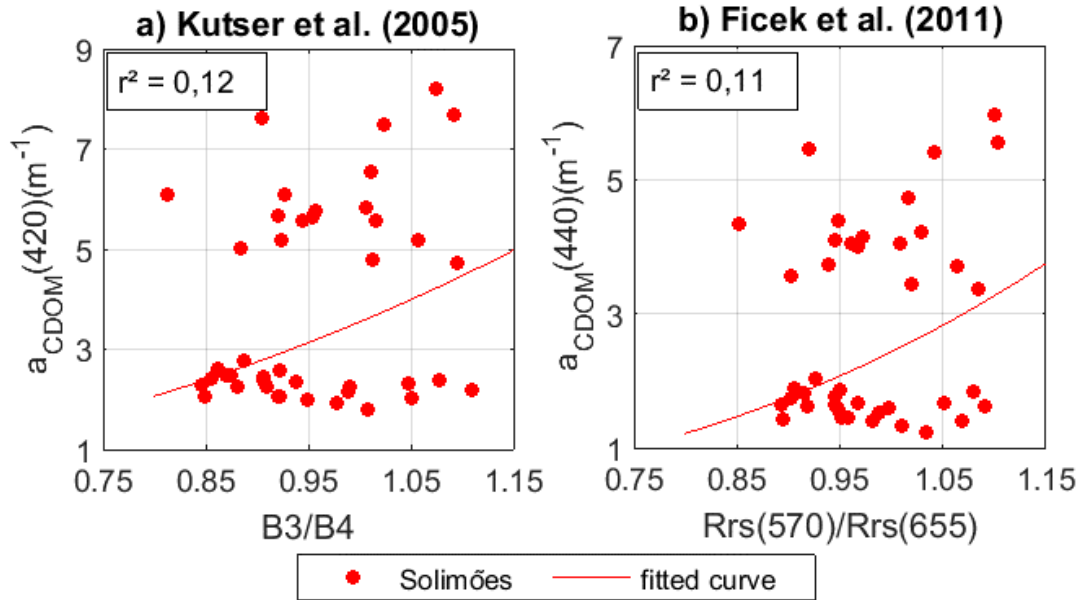

Figure S3 - Relationship between (a) the band ratio proposed by KUTSER et al. (2005) and  $a_{CDOM}(420)$  and (b) wavelength ratio proposed by FICEK et al. (2011) and  $a_{CDOM}(440)$ .
